# Supplementary material
Source: PubMed Central journal article supplement (PMC9636488)
Supplement: NIHMS1839739-supplement-Supplementary_Material.pdf [file NIHMS1839739-supplement-Supplementary_Material.pdf]

## **Supplementary Materials**

# **Protein folding *in vitro* and in the cell: from a solitary journey to a team effort**

Miranda F. Mecha,<sup>a,†</sup> Rachel B. Hutchinson,<sup>a,†</sup> Jung Ho Lee,<sup>a,1</sup> Silvia Cavagnero<sup>a,\*</sup>

<sup>a</sup> Department of Chemistry, University of Wisconsin-Madison, Madison, WI 53706

<sup>1</sup> Present address: Department of Chemistry, Seoul National University, Seoul 08826, Korea

<sup>†</sup>These authors contributed equally to this work

\*Corresponding author: Silvia Cavagnero  
Email Address: cavagnero@chem.wisc.edu

## SUPPLEMENTARY TABLES:

**Table S1.** Protein length (number of amino acids) and folding rate constant ( $k_f$ ) values of two-state folders plotted in Figure 3A.

| <b>Name</b>                                                 | <b>PDB</b> | <b>Length</b> | <b>ln <math>k_f</math></b> | <b>Reference</b> |
|-------------------------------------------------------------|------------|---------------|----------------------------|------------------|
| <b>C-terminal <math>\beta</math>-hairpin of protein GB1</b> | 1PGB       | 16            | 12.0                       | [1, 2]           |
| <b>Trp-cage protein</b>                                     | 1L2Y       | 20            | 12.5                       | [1, 3]           |
| <b>Alanine-based peptide</b>                                | NA         | 21            | 15.5                       | [1, 4]           |
| <b>BBA5 mini-protein</b>                                    | 1T8J       | 23            | 11.8                       | [1, 5]           |
| <b>Pin WW domain</b>                                        | 1PIN       | 34            | 9.5                        | [1, 6]           |
| <b>Villin headpeace subdomain</b>                           | 1VII       | 36            | 9.4                        | [1, 7]           |
| <b>Formin-binding protein</b>                               | 1E0L       | 37            | 10.6                       | [1, 8]           |
| <b>Prototype WW domain</b>                                  | 1E0M       | 38            | 8.9                        | [1, 8]           |
| <b>Yes kinase-associated protein</b>                        | 1JMQ       | 40            | 8.4                        | [1, 8]           |
| <b>Peripheral subunit-binding domain</b>                    | 2PDD       | 41            | 9.8                        | [1, 9]           |
| <b>E3-binding domain of BBL</b>                             | 2WXC       | 47            | 11.2                       | [1]              |
| <b>GA module of albumin binding domain</b>                  | 1PRB       | 47            | 13.8                       | [1, 10]          |
| <b>POB</b>                                                  | 1W4J       | 51            | 12.3                       | [1]              |
| <b>TRF1 Myb domain</b>                                      | 1BA5       | 53            | 5.9                        | [1, 11]          |
| <b>c-Myb-transforming protein</b>                           | 1GV2       | 55            | 8.7                        | [1, 12]          |
| <b>N-terminal domain from ribosomal protein L9</b>          | 1DIV       | 56            | 6.6                        | [1, 13]          |
| <b>B-domain of staphylococcal proteinA</b>                  | 1BDD       | 58            | 11.7                       | [1, 14]          |
| <b>RAP1 Myb domain</b>                                      | 1FEX       | 59            | 8.2                        | [1, 11]          |

|                                                               |      |    |      |         |
|---------------------------------------------------------------|------|----|------|---------|
| <b>B1 domain of streptococcal protein G</b>                   | 3GB1 | 62 | 6.3  | [1]     |
| <b>Src SH3 domain</b>                                         | 1RLQ | 62 | 4.4  | [1, 13] |
| <b><math>\alpha</math>-spectrin SH3 domain</b>                | 1SHG | 62 | 1.1  | [1, 13] |
| <b>B1 domain of streptococcal protein G</b>                   | 3GB1 | 62 | 6.3  | [13]    |
| <b>Sso7d protein, Y34W</b>                                    | 1BNZ | 64 | 7.0  | [1]     |
| <b>Sso7d protein, Y34W</b>                                    | 1C8C | 64 | 6.95 | [15]    |
| <b>Chymotrypsin inhibitor 2</b>                               | 2CI2 | 65 | 5.8  | [1, 13] |
| <b>Cold shock protein B</b>                                   | 1C9O | 66 | 7.2  | [1, 16] |
| <b>Cold shock protein B</b>                                   | 1G6P | 66 | 6.3  | [1, 16] |
| <b>Cold shock protein B</b>                                   | 1CSP | 67 | 6.5  | [1, 16] |
| <b>LysM domain</b>                                            | 1E0G | 66 | 7.0  | [1]     |
| <b>Actin binding protein ABP1 SH3 domain</b>                  | 1JO8 | 68 | 2.5  | [1, 13] |
| <b>Photosystem I accessory protein E</b>                      | 1PSF | 69 | 3.2  | [1]     |
| <b>Cold shock protein A</b>                                   | 1MJC | 70 | 5.3  | [1, 17] |
| <b>Immunoglobulin light chain-binding domain of protein L</b> | 1HZ5 | 72 | 4.1  | [1]     |
| <b><math>\alpha</math>3D</b>                                  | 2A3D | 73 | 12.2 | [1, 18] |
| <b>Sho1 SH3 domain</b>                                        | 2VKN | 76 | 2.1  | [1, 13] |
| <b>Ubiquitin</b>                                              | 1UBQ | 76 | 7.3  | [1, 13] |
| <b>Fyn SH3 domain</b>                                         | 1AVZ | 78 | 4.9  | [1, 13] |
| <b>Immunoglobulin light chain-binding domain of protein L</b> | 2PTL | 79 | 4.1  | [13]    |

|                                                                                           |      |    |      |         |
|-------------------------------------------------------------------------------------------|------|----|------|---------|
| <b>Ras-binding domain of C-raf-1</b>                                                      | 1RFA | 80 | 8.4  | [1, 13] |
| <b>l-repressor</b>                                                                        | 1LMB | 80 | 10.4 | [13]    |
| <b>Activation domain of procarboxypeptidase A2</b>                                        | 1O6X | 81 | 6.8  | [1, 13] |
| <b>l-repressor</b>                                                                        | 1LMB | 81 | 10.4 | [1]     |
| <b>Histidine-containing phosphocarrier protein</b>                                        | 1POH | 85 | 2.7  | [1, 19] |
| <b>SH3-like domain of virulence protein internalin B</b>                                  | 1M9S | 85 | 4.0  | [1, 13] |
| <b>Acyl-coenzyme A binding protein</b>                                                    | 1NTI | 86 | 7.0  | [1, 13] |
| <b>CAfn2 (B. circulans)</b>                                                               | 1K85 | 88 | 1.4  | [1]     |
| <b>N-domain of spore coat protein S</b>                                                   | 1PRS | 88 | 3.0  | [1]     |
| <b>Hypothetical protein encoded by the Ybjj gene from E.coli</b>                          | 1JYG | 89 | 9.1  | [1, 13] |
| <b>Ninth fibronectin type III module of fibronectin</b>                                   | 1FNF | 90 | -0.9 | [1, 20] |
| <b>SH3 domain of the p85<math>\alpha</math> subunit of phosphatidylinositol 3'-kinase</b> | 1PNJ | 90 | -1.0 | [1, 21] |
| <b>Third fibronectin type III repeat of tenascin</b>                                      | 1TEN | 90 | 1.1  | [22]    |
| <b>C-domain of spore coat protein S</b>                                                   | 1PRS | 91 | -2.0 | [1]     |
| <b>C-terminal domain from ribosomal protein L9</b>                                        | 1DIV | 92 | 3.3  | [1, 13] |

**Third fibronectin type III repeat of**

|                                                          |      |     |      |         |
|----------------------------------------------------------|------|-----|------|---------|
| <b>tenascin</b>                                          | 1TEN | 92  | 1.1  | [1]     |
| <b>18th module of muscle protein twitchin</b>            | 1WIT | 93  | 0.4  | [1]     |
| <b>Colicin E9 immunity protein</b>                       | 1IMQ | 93  | 7.3  | [1, 13] |
| <b>hbLBD</b>                                             | 1K8M | 93  | -0.7 | [1]     |
| <b>18th module of muscle protein twitchin</b>            | 1WIT | 93  | 0.4  | [23]    |
| <b>Colicin E7 immunity protein</b>                       | 1AYI | 94  | 7.2  | [1, 13] |
| <b>Ribosomal protein L23</b>                             | 1N88 | 96  | 2.0  | [1, 13] |
| <b>Common-type acylphosphatase</b>                       | 2VH7 | 98  | 0.8  | [1]     |
| <b>Common-type acylphosphatase</b>                       | 2ACY | 98  | 0.8  | [24]    |
| <b>Muscle acylphosphatase</b>                            | 1APS | 99  | -1.6 | [1, 13] |
| <b>Death domain</b>                                      | 1E41 | 100 | 6.9  | [1]     |
| <b>Ribosomal protein S6</b>                              | 1RIS | 101 | 6.1  | [1, 13] |
| <b>Ubiquitin related modifier 1</b>                      | 2PKO | 101 | 2.6  | [1, 13] |
| <b>Spliceosomal protein U1A</b>                          | 1AUD | 102 | 4.6  | [1, 13] |
| <b>apocytochrome b5</b>                                  | 1HKO | 104 | 3.0  | [1]     |
| <b>Cytochrome b562</b>                                   | 256B | 106 | 12.3 | [1, 25] |
| <b>FK506 binding protein</b>                             | 1FKF | 109 | 1.6  | [1, 13] |
| <b>Src SH2 domain</b>                                    | 1IS0 | 110 | 8.7  | [1, 13] |
| <b>P13</b>                                               | 1QTU | 117 | -0.4 | [1]     |
| <b>15th domain of brain <math>\alpha</math>-spectrin</b> | 1U5P | 118 | 11.0 | [1, 26] |
| <b>16th domain of brain <math>\alpha</math>-spectrin</b> | 1CUN | 118 | 4.8  | [1, 26] |
| <b>17th domain of brain <math>\alpha</math>-spectrin</b> | 1CUN | 118 | 3.4  | [1, 26] |

|                                              |      |     |     |         |
|----------------------------------------------|------|-----|-----|---------|
| <b>Hypothetical protein Tm1083</b>           | 1J5U | 124 | 6.9 | [1, 13] |
| <b>Chemotaxis protein CheW</b>               | 1K0S | 151 | 7.4 | [1, 13] |
| <b>Cyclophilin A</b>                         | 1LOP | 164 | 6.6 | [1, 27] |
| <b>Apoflavodoxin (Anabaena sp.)</b>          | 1RCF | 169 | 0.8 | [1]     |
| <b>Lyme disease variable surface antigen</b> | 1L8W | 338 | 2.0 | [1, 13] |

**Table S2.** Protein chain length and folding rate constant ( $k_f$ ) values of multi-state folders of Figure 3B.

| <b>Name</b>                                                       | <b>PDB</b> | <b>Length</b> | <b>ln <math>k_f</math></b> | <b>Reference</b> |
|-------------------------------------------------------------------|------------|---------------|----------------------------|------------------|
| <b>Engrailed homeodomain</b>                                      | 1ENH       | 61            | 10.5                       | [1, 11]          |
| <b>Phage 434 cro protein</b>                                      | 2CRO       | 71            | 3.7                        | [1, 28]          |
| <b>FF domain</b>                                                  | 1UZC       | 71            | 7.7                        | [1]              |
| <b>ACBP (Yeast)</b>                                               | 1ST7       | 86            | 8.5                        | [1]              |
| <b>Immunoglobulin domain of cardiac titin</b>                     | 1TIT       | 89            | 3.6                        | [1, 29]          |
| <b>Barstar</b>                                                    | 1BRS       | 89            | 3.4                        | [1, 30]          |
| <b>N-terminal domain of HypF</b>                                  | 1GXT       | 91            | 4.4                        | [1, 31]          |
| <b>Third PDZ domain from PSD-95</b>                               | 1TP3       | 93            | 3.0                        | [1]              |
| <b>Tenth fibronectin type III domain of fibronectin</b>           | 1FNF       | 94            | 5.5                        | [1, 32]          |
| <b>PDZ2 domain from PTP-BL</b>                                    | 1GM1       | 94            | 1.0                        | [1]              |
| <b>FRB</b>                                                        | 1AUE       | 95            | 6.0                        | [1]              |
| <b>C-terminal domain of the cell-surface receptor protein CD2</b> | 1HNG       | 98            | 1.8                        | [1, 33]          |
| <b>Barnase</b>                                                    | 1BNI       | 110           | 2.6                        | [1, 34]          |
| <b>Cell-cycle regulatory protein p13suc1</b>                      | SUC1       | 113           | 4.2                        | [1, 35]          |
| <b>Hisactophilin</b>                                              | 1HCD       | 118           | 4.6                        | [1]              |
| <b>Myotrophin</b>                                                 | 2MYO       | 118           | 4.8                        | [1]              |
| <b>Villin 14T, N-terminal domain of villin</b>                    | 2VIK       | 126           | 5                          | [1, 36]          |
| <b>Ileal lipid binding protein</b>                                | 1EAL       | 127           | 1.3                        | [1, 37]          |

|                                                               |      |     |      |         |
|---------------------------------------------------------------|------|-----|------|---------|
| <b>Chemotactic protein</b>                                    | 3CHY | 129 | 1    | [1, 38] |
| <b>Intestinal fatty acid binding protein</b>                  | 1IFC | 131 | 3.4  | [1, 39] |
| <b>Cellular retinol binding protein II</b>                    | 1OPA | 134 | 1.4  | [1, 39] |
| <b>Cellular retinoic acid binding protein I</b>               | 1CBI | 138 | -3.2 | [1, 39] |
| <b>RNase-H (<i>C. tepidum</i>)</b>                            | 3H08 | 146 | 1.9  | [1]     |
| <b>Tumour suppressor protein p16</b>                          | 2A5E | 148 | 3.5  | [1, 40] |
| <b>Apoflavodoxin (<i>D. desulfuricans</i>)</b>                | 3F6R | 148 | 3.5  | [1]     |
| <b>Staphylococcal nuclease</b>                                | 1SNQ | 149 | 2.3  | [1]     |
| <b>Apomyoglobin</b>                                           | 1A6N | 151 | 1.1  | [1, 41] |
| <b>C-terminally truncated fragment of GroEL apical domain</b> | 1AON | 155 | -1.5 | [1, 42] |
| <b>Ribonuclease HI</b>                                        | 2RN2 | 155 | 0.1  | [1, 43] |
| <b>Dihydrofolate reductase</b>                                | 1RA9 | 159 | -3.2 | [1, 44] |
| <b>T4 lysozyme</b>                                            | 2LZM | 164 | 4.1  | [1, 43] |
| <b>p19INK4d</b>                                               | 1BI8 | 166 | 2.2  | [1]     |
| <b>N-terminal domain of phosphoglycerate kinase</b>           | 1PHP | 175 | 2.3  | [1, 43] |
| <b>C-terminal domain of phosphoglycerate kinase</b>           | 1PHP | 221 | -3.5 | [1, 45] |
| <b>Sigps</b>                                                  | 1IGS | 222 | -7.8 | [1]     |
| <b>Carbonic anhydrase</b>                                     | 5A25 | 260 | -4.2 | [1]     |
| <b>Tryptophan synthase <math>\alpha</math> subunit</b>        | 1QOP | 268 | -2.5 | [1, 46] |
| <b>Tryptophan synthase <math>\beta</math>2 subunit</b>        | 1QOP | 396 | -6.9 | [1, 47] |



## SUPPLEMENTARY REFERENCES:

- [1] M. Corrales, P. Cuscó, D.R. Usmanova, H.-C. Chen, N.S. Bogatyreva, G.J. Filion, D.N. Ivankov, Machine learning: How much does it tell about protein folding rates?, PLoS ONE 10 (2015) e0143166.
- [2] V. Muñoz, P.A. Thompson, J. Hofrichter, W.A. Eaton, Folding dynamics and mechanism of  $\beta$ -hairpin formation, Nature 390 (1997) 196-199.
- [3] L.L. Qiu, S.A. Pabit, A.E. Roitberg, S.J. Hagen, Smaller and faster: The 20-residue Trp-cage protein folds in 4  $\mu$ s, J. Am. Chem. Soc. 124 (2002) 12952-12953.
- [4] P.A. Thompson, W.A. Eaton, J. Hofrichter, Laser Temperature Jump Study of the Helix $\rightleftharpoons$ Coil Kinetics of an Alanine Peptide Interpreted with a 'Kinetic Zipper' Model, Biochemistry 36 (1997) 9200-9210.
- [5] C.D. Snow, N. Nguyen, V.S. Pande, M. Gruebele, Absolute comparison of simulated and experimental protein-folding dynamics, Nature 420 (2002) 102-106.
- [6] M. Jäger, H. Nguyen, J.C. Crane, J.W. Kelly, M. Gruebele, The folding mechanism of a  $\beta$ -sheet: the WW domain, J. Mol. Biol. 311 (2001) 373-393.
- [7] M.H. Wang, Y.F. Tang, S.S. Sato, L. Vugmeyster, C.J. McKnight, D.P. Raleigh, Dynamic NMR line-shape analysis demonstrates that the villin headpiece subdomain folds on the microsecond time scale, J. Am. Chem. Soc. 125 (2003) 6032-6033.
- [8] N. Ferguson, C.M. Johnson, M. Macias, H. Oschkinat, A. Fersht, Ultrafast folding of WW domains without structured aromatic clusters in the denatured state, Proc. Natl. Acad. Sci. USA 98 (2001) 13002-13007.
- [9] S. Spector, D.P. Raleigh, Submillisecond folding of the peripheral subunit-binding domain, J. Mol. Biol. 293 (1999) 763-768.
- [10] T. Wang, Y.J. Zhu, F. Gai, Folding of a three-helix bundle at the folding speed limit, J. Phys. Chem. B 108 (2004) 3694-3697.
- [11] S. Gianni, N.R. Guydosh, F. Khan, T.D. Caldas, U. Mayor, G.W.N. White, M.L. DeMarco, V. Daggett, A.R. Fersht, Unifying features in protein-folding mechanisms, Proc. Natl. Acad. Sci. USA 100 (2003) 13286-13291.
- [12] S. Gianni, Y. Ivarsson, P. Jemth, M. Brunori, C. Travaglini-Allocatelli, Identification and characterization of protein folding intermediates, Biophys. Chem. 128 (2007) 105-113.
- [13] K.L. Maxwell, D. Wildes, A. Zarrine-Afsar, M.A. de los Rios, A.G. Brown, C.T. Friel, L. Hedberg, J.C. Horng, D. Bona, E.J. Miller, A. Vallee-Belisle, E.R.G. Main, F. Bemporad, L.L. Qiu, K. Teilum, N.D. Vu, A.M. Edwards, I. Ruczinski, F.M. Poulsen, B.B. Kragelund, S.W. Michnick, F. Chiti, Y.W. Bai, S.J. Hagen, L. Serrano, M. Oliveberg, D.P. Raleigh, P. Wittung-Stafshede, S.E. Radford, S.E. Jackson, T.R. Sosnick, S. Marqusee, A.R. Davidson, K.W. Plaxco, Protein folding: Defining a "standard" set of experimental conditions and a preliminary kinetic data set of two-state proteins, Protein Sci. 14 (2005) 602-616.
- [14] J.K. Myers, T.G. Oas, Preorganized secondary structure as an important determinant of fast protein folding, Nat. Struct. Biol. 8 (2001) 552-558.
- [15] R. Guerois, L. Serrano, The SH3-fold Family: Experimental Evidence and Prediction of Variations in the Folding Pathways, J. Mol. Biol. 304 (2000) 967-982.
- [16] D. Perl, C. Welker, T. Schindler, K. Schroder, M.A. Marahiel, R. Jaenicke, F.X. Schmid, Conservation of rapid two-state folding in mesophilic, thermophilic and hyperthermophilic cold shock proteins, Nat. Struct. Biol. 5 (1998) 229-235.

- [17] K.L. Reid, H.M. Rodriguez, B.J. Hillier, L.M. Gregoret, Stability and folding properties of a model beta-sheet protein, *Escherichia coli* CspA, *Protein Sci.* 7 (1998) 470-479.
- [18] Y. Zhu, D.O.V. Alonso, K. Maki, C.Y. Huang, S.J. Lahr, V. Daggett, H. Roder, W.F. DeGrado, F. Gai, Ultrafast folding of alpha(3): A de novo designed three-helix bundle protein, *Proc. Natl. Acad. Sci. USA* 100 (2003) 15486-15491.
- [19] N.A.J. Van Nuland, W. Meijberg, J. Warner, V. Forge, R.M. Scheek, G.T. Robillard, C.M. Dobson, Slow cooperative folding of a small globular protein HPr, *Biochemistry* 37 (1998) 622-637.
- [20] K.W. Plaxco, C. Spitzfaden, I.D. Campbell, C.M. Dobson, A comparison of the folding kinetics and thermodynamics of two homologous fibronectin type III modules, *J. Mol. Biol.* 270 (1997) 763-770.
- [21] J.I. Guijarro, C.J. Morton, K.W. Plaxco, I.D. Campbell, C.M. Dobson, Folding kinetics of the SH3 domain of PI3 kinase by real-time NMR combined with optical spectroscopy<sup>11</sup>Edited by P. E. Wright, *J. Mol. Biol.* 276 (1998) 657-667.
- [22] J. Clarke, S.J. Hamill, C.M. Johnson, Folding and stability of a fibronectin type III domain of human tenascin, *J. Mol. Biol.* 270 (1997) 771-778.
- [23] J. Clarke, E. Cota, S.B. Fowler, S.J. Hamill, Folding studies of immunoglobulin-like beta-sandwich proteins suggest that they share a common folding pathway, *Structure* 7 (1999) 1145-1153.
- [24] N. Taddei, F. Chiti, P. Paoli, T. Fiaschi, M. Bucciantini, M. Stefani, C.M. Dobson, G. Ramponi, Thermodynamics and kinetics of folding of common-type acylphosphatase: Comparison to the highly homologous muscle isoenzyme, *Biochemistry* 38 (1999) 2135-2142.
- [25] P. Wittung-Stafshede, J.C. Lee, J.R. Winkler, H.B. Gray, Cytochrome folding triggered by electron transfer: Approaching the speed limit for formation of a four-helix-bundle protein, *Proc. Natl. Acad. Sci. USA* 96 (1999) 6587-6590.
- [26] K.A. Scott, S. Batey, K.A. Hooton, J. Clarke, The folding of spectrin domains I: wild-type domains have the same stability but very different kinetic properties, *J. Mol. Biol.* 344 (2004) 195-205.
- [27] T. Ikura, T. Hayano, N. Takahashi, K. Kuwajima, Fast folding of *Escherichia coli* cyclophilin A: a hypothesis of a unique hydrophobic core with a phenylalanine cluster<sup>11</sup>Edited by C. R. Matthews, *J. Mol. Biol.* 297 (2000) 791-802.
- [28] D.V. Laurents, S. Corrales, M. Elías-Arnanz, P. Sevilla, M. Rico, S. Padmanabhan, Folding Kinetics of Phage 434 Cro Protein, *Biochemistry* 39 (2000) 13963-13973.
- [29] S.B. Fowler, J. Clarke, Mapping the folding pathway of an immunoglobulin domain: Structural detail from phi value analysis and movement of the transition state, *Structure* 9 (2001) 355-366.
- [30] G. Schreiber, A.R. Fersht, The refolding of cis-peptidylprolyl and trans-peptidylprolyl isomers of barstar, *Biochemistry* 32 (1993) 11195-11203.
- [31] G. Calloni, N. Taddei, K.W. Plaxco, G. Ramponi, M. Stefani, F. Chiti, Comparison of the folding processes of distantly related proteins. Importance of hydrophobic content in folding, *J. Mol. Biol.* 330 (2003) 577-591.
- [32] E. Cota, J. Clarke, Folding of beta-sandwich proteins: Three-state transition of a fibronectin type III module, *Protein Sci.* 9 (2000) 112-120.

- [33] M.J. Parker, C.E. Dempsey, M. Lorch, A.R. Clarke, Acquisition of native beta-strand topology during the rapid collapse phase of protein folding, *Biochemistry* 36 (1997) 13396-13405.
- [34] A. Matouschek, J.T. Kellis, L. Serrano, M. Bycroft, A.R. Fersht, Transient folding intermediates characterized by protein engineering, *Nature* 346 (1990) 440-445.
- [35] J.W.H. Schymkowitz, F. Rousseau, L.R. Irvine, L.S. Itzhaki, The folding pathway of the cell-cycle regulatory protein p13suc1: clues for the mechanism of domain swapping, *Structure* 8 (2000) 89-100.
- [36] S.E. Choe, P.T. Matsudaira, J. Osterhout, G. Wagner, E.I. Shakhnovich, Folding kinetics of villin 14T, a protein domain with a central beta-sheet and two hydrophobic cores, *Biochemistry* 37 (1998) 14508-14518.
- [37] P.M. Dalessio, I.J. Ropson, beta-sheet proteins with nearly identical structures have different folding intermediates, *Biochemistry* 39 (2000) 860-871.
- [38] V. Munoz, E.M. Lopez, M. Jager, L. Serrano, Kinetic characterization of the chemotactic protein from escherichia-coli, chey - kinetic-analysis of the inverse hydrophobic effect, *Biochemistry* 33 (1994) 5858-5866.
- [39] L.L. Burns, P.M. Dalessio, I.J. Ropson, Folding mechanism of three structurally similar beta-sheet proteins, *Proteins: Struct. Funct. Genet.* 33 (1998) 107-118.
- [40] K.S. Tang, B.J. Guralnick, W.K. Wang, A.R. Fersht, L.S. Itzhaki, Stability and folding of the tumour suppressor protein p1611, *J. Mol. Biol.* 285 (1999) 1869-1886.
- [41] S. Cavagnero, H.J. Dyson, P.E. Wright, Effect of H helix destabilizing mutations on the kinetic and equilibrium folding of apomyoglobin11 Edited by F. Cohen, *J. Mol. Biol.* 285 (1999) 269-282.
- [42] R. Golbik, R. Zahn, S.E. Harding, A.R. Fersht, Thermodynamic stability and folding of GroEL minichaperones, *J. Mol. Biol.* 276 (1998) 505-515.
- [43] M.J. Parker, S. Marqusee, The cooperativity of burst phase reactions explored, *J. Mol. Biol.* 293 (1999) 1195-1210.
- [44] P.A. Jennings, P.E. Wright, Formation of a molten globule intermediate early in the kinetic folding pathway of apomyoglobin, *Science* 262 (1993) 892.
- [45] M.J. Parker, R.B. Sessions, I.G. Badcoe, A.R. Clarke, The development of tertiary interactions during the folding of a large protein, *Fold Des.* 1 (1996) 145-156.
- [46] K. Ogasahara, K. Yutani, Unfolding-refolding kinetics of the tryptophan synthase alpha-subunit by CD and fluorescence measurements, *J. Mol. Biol.* 236 (1994) 1227-1240.
- [47] M.E. Goldberg, G.V. Semisotnov, B. Friguet, K. Kuwajima, O.B. Ptitsyn, S. Sugai, An early immunoreactive folding intermediate of the tryptophan synthase  $\beta$ 2 subunit is a 'molten globule', *FEBS Lett.* 263 (1990) 51-56.
